# Supplementary material
Source: PubMed Central journal article supplement (PMC9490855)
Supplement: mmc1.pdf [file mmc1.pdf]

**Cell Reports Physical Science, Volume 3**

**Supplemental information**

**Mechanosensing view of SARS-CoV-2 infection**

**by a DNA nano-assembly**

**Jialu Zhang, Yihao Huang, Miao Sun, Ting Song, Shuang Wan, Chaoyong Yang, and Yanling Song**

## Supporting Information

### Supporting Figures

|                                                                                              |       |                                                                                               |       |                                                                                              |                                                  |
|----------------------------------------------------------------------------------------------|-------|-----------------------------------------------------------------------------------------------|-------|----------------------------------------------------------------------------------------------|--------------------------------------------------|
| TriApTDF<br> <br>GAG ACG AGC CAC CGA GCA GAG-3'<br>3'-CTC TGC TCG GTG GCT CGT CTC-5'         | 56pN  | TriApTDF<br> <br>GAG ACG AGC CAC CGA GCA GAG-3'<br>3'-CTC TGC TCG GTG GCT <b>T</b> CGT CTC-5' | 53pN  | TriApTDF<br> <br>GAG ACG AGC CAC CGA GCA GAG-3'<br>3'-CTC TGC TCG <b>G</b> TG GCT CGT CTC-5' | 43pN                                             |
| TriApTDF<br> <br>GAG ACG AGC CAC CGA GCA GAG-3'<br>3'-CTC TGC <b>T</b> CG GTG GCT CGT CTC-5' | 33pN  | TriApTDF<br> <br>GAG ACG AGC CAC CGA GCA GAG-3'<br>3'-CTC <b>T</b> GC TCG GTG GCT CGT CTC-5'  | 23pN  | TriApTDF<br> <br>GAG ACG AGC CAC CGA GCA GAG-3'<br>3'-CTC TGC TCG GTG GCT CGT CTC-5'         | 12pN                                             |
| TriApTDF<br> <br>GCG CGC ATG-3'<br>3'- <b>C</b> GC GCG TAC-5'                                | 9.6pN | TriApTDF<br> <br>GTA AAT ATG-3'<br>3'- <b>C</b> AT TTA TAC-5'                                 | 4.7pN | 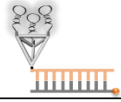          | Bases in red font<br>indicate modified<br>biotin |

**Figure S1.** The TGT module comprising double-stranded DNA in unzipping or shear geometry, displaying estimated tensile forces of 4.7, 9.6, 12, 23, 33, 43 and 56 pN<sup>1,2</sup>. Using DNA hybridization, we obtained a series of TGT modules with different defined pN-scale tensile forces.

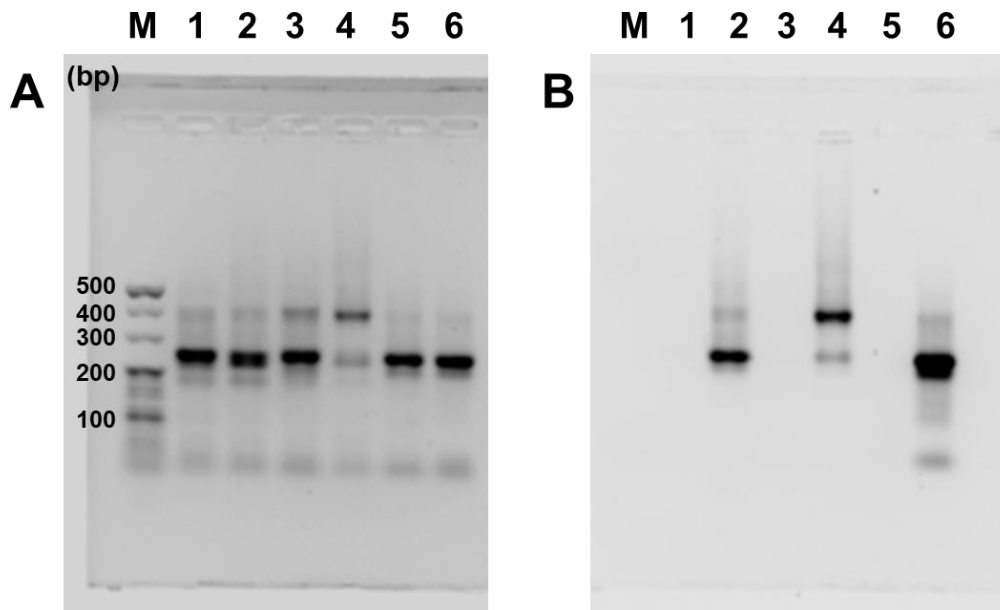

**Figure S2.** Agarose gel electrophoresis analysis of the binding module at excitation wavelength of (A) UV and (B) 647 nm. Lane 1: s12-56pN-TriApTDF, Lane 2: Cy5-labelled s12-56pN-TriApTDF, Lane 3: s9.6pN-TriApTDF, Lane 4: Cy5-labelled s9.6pN-TriApTDF, Lane 5: s4.7pN-TriApTDF and Lane 6: Cy5 labelled s4.7pN-TriApTDF. Although Cy5-labelled s9.6pN-TriApTDF displayed many more by-products, we mainly used s4.7pN-TriApTDF, s9.6pN-TriApTDF and s12-56pN-TriApTDF to analyze the mechanical force between SARS-CoV-2 and host cell. The extra band below 100 bp may be the excess single-stranded DNA of A17-12-56pN, or A17-9.6pN, or A17-4.7pN.

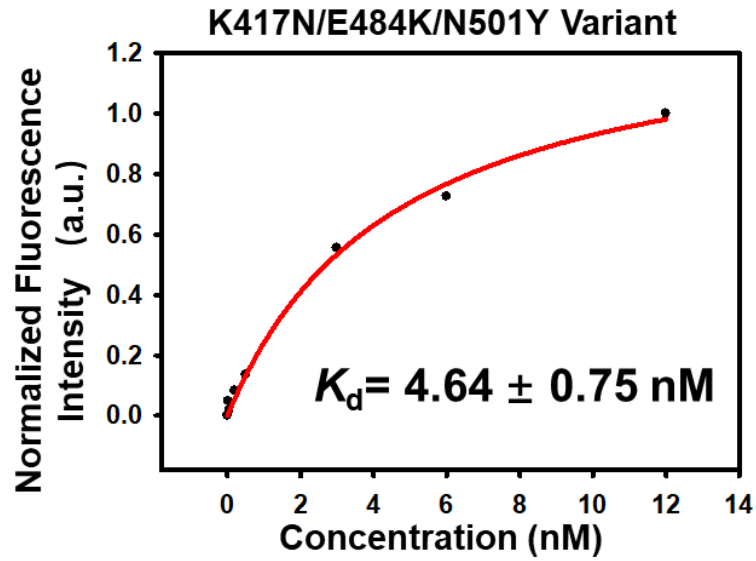

**Figure S3.** The binding curve and dissociation constant of TriApTDF against SARS-CoV-2 RBD-beads of K417N/E484K/N501Y variant in binding buffer.

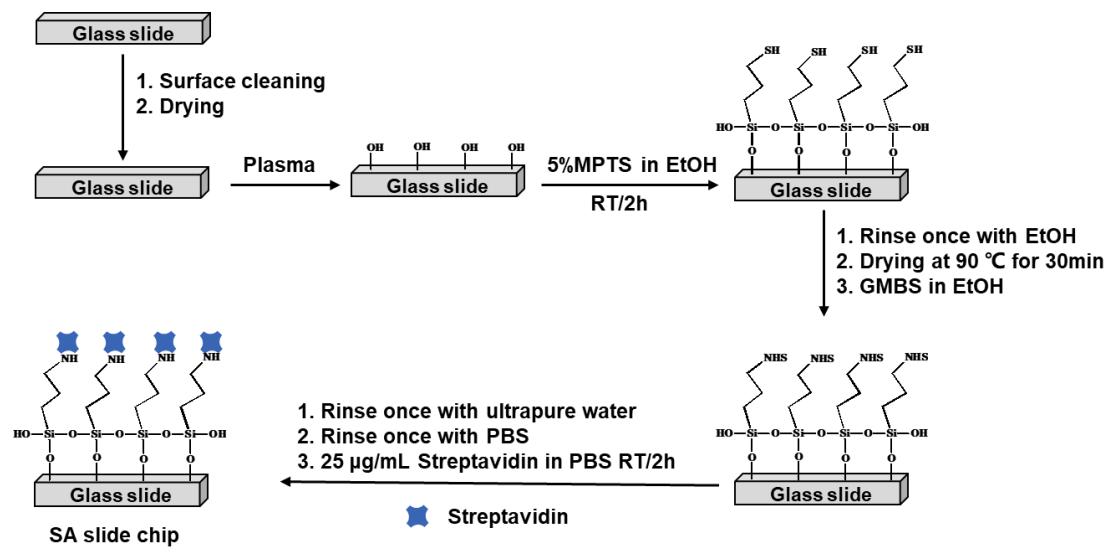

**Figure S4.** Diagram of the modification process for streptavidin-functionalized glass slide chip.

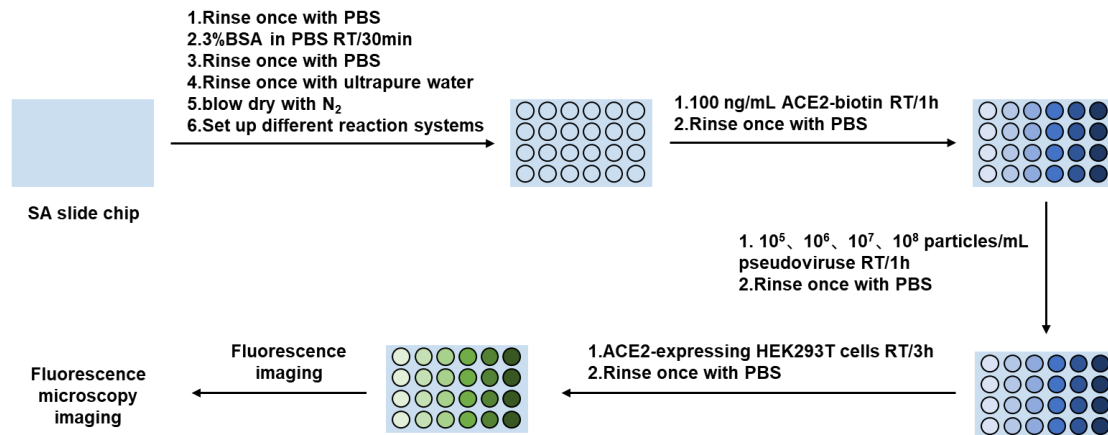

**Figure S5.** Experimental process of the optimization of the particle concentration of wild type SARS-CoV-2 pseudoviruses.

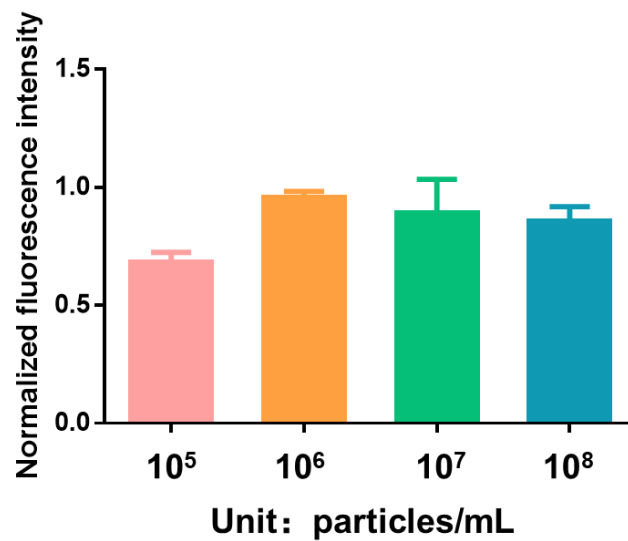

**Figure S6.** The optimization of the particle concentration of wild type SARS-CoV-2 pseudoviruse.

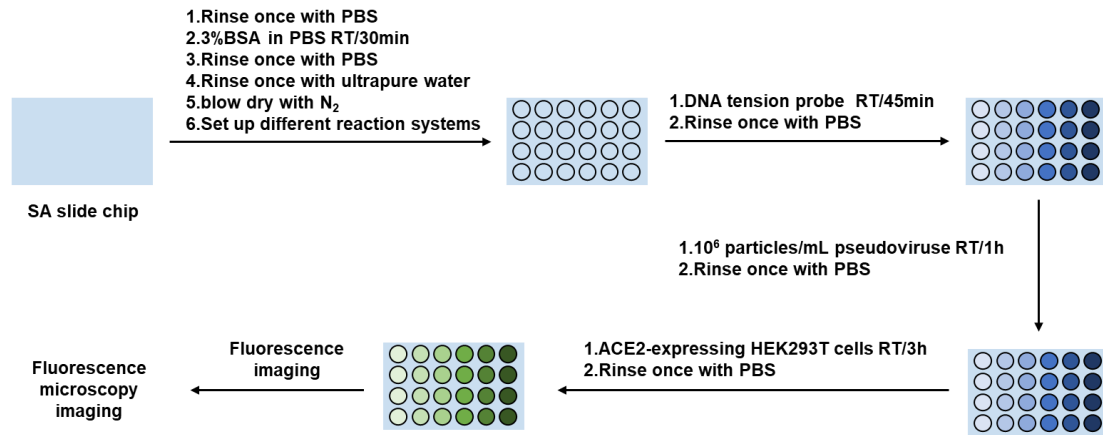

**Figure S7.** Working flow chart of Virus-TGT for determining the mechanical forces between SARS-CoV-2 pseudovirus and ACE2-expressing HEK293T cells.

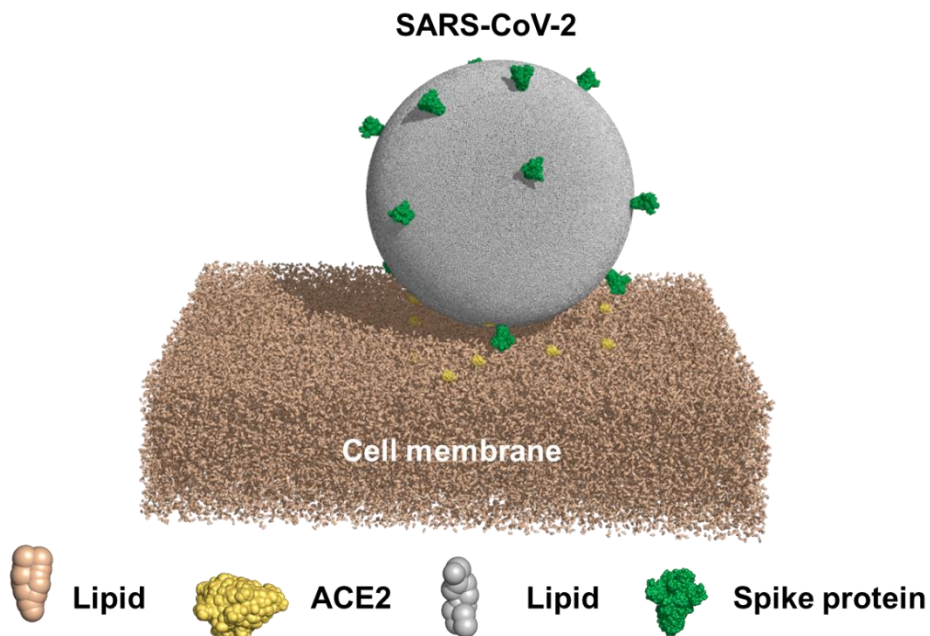

**Figure S8.** Schematic illustration of the CG model in DPD simulations: SARS-CoV-2 virus nanoparticle (90 nm) consists of twelve spike trimer protein. Spike protein with green color represents wild type SARS-CoV-2 virus based on the protein crystal structures of wild type (PDB: 7DDN). The cell membrane is composed of lipids (light brown) and membrane protein ACE2 (yellow).

## Supporting Tables

**Table S1.** DNA sequences.

| Name                | Sequence (5'-3')                                                                       |
|---------------------|----------------------------------------------------------------------------------------|
| A17-12-56pN         | ACATTCCTAAGTCTGAAACATTACAGCTTGCTACACGAGAAGAGCCGCCATAGTAT<br>TGAGACGAGCCACCGAGCAGAG     |
| A17-12-56pN-cy5     | ACATTCCTAAGTCTGAAACATTACAGCTTGCTACACGAGAAGAGCCGCCATAGTAT<br>TGAGACGAGCCACCGAGCAGAG-cy5 |
| A17-9.6pN           | ACATTCCTAAGTCTGAAACATTACAGCTTGCTACACGAGAAGAGCCGCCATAGTAT<br>TGCGCGCATG                 |
| A17-9.6pN-cy5       | ACATTCCTAAGTCTGAAACATTACAGCTTGCTACACGAGAAGAGCCGCCATAGTAT<br>TGCGCGCATG-cy5             |
| A17-4.7pN           | ACATTCCTAAGTCTGAAACATTACAGCTTGCTACACGAGAAGAGCCGCCATAGTAT<br>TGTAATATG                  |
| A17-4.7pN-cy5       | ACATTCCTAAGTCTGAAACATTACAGCTTGCTACACGAGAAGAGCCGCCATAGTAT<br>TGTAATATG-cy5              |
| A                   | ACATTCCTAAGTCTGAAACATTACAGCTTGCTACACGAGAAGAGCCGCCATAGTA                                |
| B17-L               | TATCACCAGGCAGTTGACAGTGTAGCAAGCTGTAATAGATGCGAGGGTCCAATACC<br>TGACCACGAGCTCC             |
| C17-L               | TCAACTGCCTGGTGATAAACGACACTACGTGGGAATCTACTATGGCGGCTCTTCCT<br>GACCACGAGCTCC              |
| D17-L               | TTCAGACTTAGGAATGTGCTTCCCACGTAGTGTCGTTTGTATTGGACCCTCGCATCT<br>GACCACGAGCTCC             |
| B17                 | TATCACCAGGCAGTTGACAGTGTAGCAAGCTGTAATAGATGCGAGGGTCCAATACC                               |
| C17                 | TCAACTGCCTGGTGATAAACGACACTACGTGGGAATCTACTATGGCGGCTCTTC                                 |
| D17                 | TTCAGACTTAGGAATGTGCTTCCCACGTAGTGTCGTTTGTATTGGACCCTCGCAT                                |
| CoV2-6C-L           | CGCAGCACCCAAGAACAAGGACTGCTTAGGATTGCGATAGGTTCCGGGAGCTCGTG<br>GTCAG                      |
| Alexa 488-CoV2-6C-L | Alexa 488-<br>CGCAGCACCCAAGAACAAGGACTGCTTAGGATTGCGATAGGTTCCGGGAGCTCGTG<br>GTCAG        |
| cy5-CoV2-6C-L       | cy5-<br>CGCAGCACCCAAGAACAAGGACTGCTTAGGATTGCGATAGGTTCCGGGAGCTCGTG<br>GTCAG              |
| 56pN                | CTCTGCTCGGTGGCTCGTCTC                                                                  |
| 53pN                | CTCTGCTCGGTGGCTCGTCTC                                                                  |
| 43pN                | CTCTGCTCGGTGGCTCGTCTC                                                                  |
| 33pN                | CTCTGCTCGGTGGCTCGTCTC                                                                  |
| 23pN                | CTCTGCTCGGTGGCTCGTCTC                                                                  |
| 12pN                | CTCTGCTCGGTGGCTCGTCTC                                                                  |
| 9.6pN               | CATGCGCGC                                                                              |
| 4.7pN               | CATATTTAC                                                                              |

**Table S2.** DNA sequences for corresponding experiments.

| Number | Probe Name                               | DNA sequence involved                                                       | Experiment name                                     |
|--------|------------------------------------------|-----------------------------------------------------------------------------|-----------------------------------------------------|
| 1      | s12-56pN-TDF                             | A17-12-56pN, B17, C17, D17                                                  | Agarose gel electrophoresis analysis                |
| 2      | s12-56pN-LTDF                            | A17-12-56pN, B17-L, C17, D17                                                |                                                     |
| 3      | s12-56pN-DimTDF                          | A17-12-56pN, B17-L, C17-L, D17                                              |                                                     |
| 4      | s12-56pN-TriTDF                          | A17-12-56pN, B17-L, C17-L, D17-L                                            |                                                     |
| 5      | s12-56pN-ApTDF                           | A17-12-56pN, B17-L, C17, D17,<br>CoV2-6C-L                                  |                                                     |
| 6      | s12-56pN-DimApTDF                        | A17-12-56pN, B17-L, C17-L, D17,<br>CoV2-6C-L                                |                                                     |
| 7      | s12-56pN-TriApTDF( <b>cy5</b> )          | A17-12-56pN( <b>cy5</b> ), B17-L, C17-L,<br>D17-L, CoV2-6C-L                |                                                     |
| 8      | s9.6pN-TriApTDF( <b>cy5</b> )            | A17-9.6pN( <b>cy5</b> ), B17-L, C17-L,<br>D17-L, CoV2-6C-L                  |                                                     |
| 9      | s4.7pN-TriApTDF( <b>cy5</b> )            | A17-4.7pN( <b>cy5</b> ), B17-L, C17-L,<br>D17-L, CoV2-6C-L                  |                                                     |
| 10     | s12-56pN-TriApTDF                        | A17-12-56pN, B17-L, C17-L, D17-L,<br>CoV2-6C-L                              | Cryo-EM                                             |
| 11     | TriApTDF (Alexa 488)                     | A17, B17-L, C17, D17, Alexa 488-<br>CoV2-6C-L                               | Flow cytometry analysis                             |
| 12     | s12-56pN-DimApTDF<br>(Alexa 488:cy5=1:1) | A17-12-56pN, B17-L, C17-L, D17,<br>Alexa 488-CoV2-6C-L, cy5-CoV2-<br>6C-L   | Total internal reflection<br>fluorescent microscope |
| 13     | s12-56pN-TriApTDF<br>(Alexa 488:cy5=2:1) | A17-12-56pN, B17-L, C17-L, D17-L,<br>Alexa 488-CoV2-6C-L, cy5-CoV2-<br>6C-L |                                                     |
| 14     | 56pN-TriApTDF ( <b>cy5</b> )             | A17-12-56pN- <b>cy5</b> , B17-L, C17-L,<br>D17-L, CoV2-6C-L, 56pN           | Fluorescence microscope                             |
| 15     | 4.7pN-TriApTDF ( <b>cy5</b> )            | A17-4.7pN- <b>cy5</b> , B17-L, C17-L, D17-<br>L, CoV2-6C-L, 4.7pN           |                                                     |
| 16     | 12-56pN-TriApTDF                         | 12-56pN-TriApTDF, 12pN or 23pN<br>or 33pN or 43pN or 53pN or 56pN           | Virus-TGT measurement                               |
| 17     | 9.6pN-TriApTDF                           | A17-9.6pN, B17-L, C17-L, D17-L,<br>CoV2-6C-L, 9.6pN                         |                                                     |
| 18     | 4.7pN-TriApTDF                           | A17-4.7pN, B17-L, C17-L, D17-L,<br>CoV2-6C-L, 4.7pN                         |                                                     |

**Table S3.** Comparison of previous SARS-CoV-2 virus-related studies to Virus-TGT in this work.

| Title                                                                                                           | Measurement object           | Method                                  | Journal                                                       |
|-----------------------------------------------------------------------------------------------------------------|------------------------------|-----------------------------------------|---------------------------------------------------------------|
| Multivalent 9-O-Acetylated-sialic acid glycoclusters as potent inhibitors for SARS-CoV-2 infection <sup>3</sup> | SARS-CoV-2/S1 and ACE2       | single molecule atomic force microscopy | <i>Nat. Commun.</i> 2022, 13 (1), 2564.                       |
| N501Y mutation of spike protein in SARS-CoV-2 strengthens its binding to receptor ACE2 <sup>4</sup>             | RBD and ACE2-expressing cell | single molecule atomic force microscopy | <i>eLife</i> 2021, 10, e69091.                                |
| Molecular interaction and inhibition of SARS-CoV-2 binding to the ACE2 receptor <sup>5</sup>                    | S1/RBD and ACE2              | single molecule atomic force microscopy | <i>Nat. Commun.</i> 2020, 11 (1), 4541.                       |
| Molecular insights into receptor binding energetics and neutralization of SARS-CoV-2 variants <sup>6</sup>      | RBD and ACE2                 | single molecule atomic force microscopy | <i>Nat. Commun.</i> 2021, 12 (1), 6977.                       |
| Biomechanical characterization of SARS-CoV-2 spike RBD and human ACE2 protein-protein interaction <sup>7</sup>  | RBD and ACE2                 | single molecule atomic force microscopy | <i>Biophys. J.</i> 2021, 120 (6), 1011-1019.                  |
| Mechanical activation of spike fosters SARS-CoV-2 viral infection <sup>8</sup>                                  | Spike/RBD and ACE2           | single-molecule magnetic tweezers       | <i>Cell Res.</i> 2021, 31 (10), 1047-1060.                    |
| A tethered ligand assay to probe SARS-CoV-2: ACE2 interactions <sup>9</sup>                                     | RBD and ACE2                 | single-molecule magnetic tweezers       | <i>Proc. Natl Acad. Sci. USA</i> 2022, 119 (14), e2114397119. |



## References

1. Wang, X., and Ha, T. (2013). Defining single molecular forces required to activate integrin and notch signaling. *Science* **340**, 991-994. 10.1126/science.1231041.
2. Yin, F., Li, M., Mao, X., Li, F., Xiang, X., Li, Q., Wang, L., Zuo, X., Fan, C., and Zhu, Y. (2020). DNA Framework-Based Topological Cell Sorters. *Angew. Chem. Int. Ed.* **59**, 10406-10410. 10.1002/anie.202002020.
3. Petitjean, S.J.L., Chen, W., Koehler, M., Jimmidi, R., Yang, J., Mohammed, D., Juniku, B., Stanifer, M.L., Boulant, S., Vincent, S.P., et al. (2022). Multivalent 9-O-Acetylated-sialic acid glycoclusters as potent inhibitors for SARS-CoV-2 infection. *Nat. Commun.* **13**, 2564. 10.1038/s41467-022-30313-8.
4. Tian F, Tong B, Sun L, Shi S, Zheng B, Wang Z, Dong X, and P, Z. (2021). N501Y mutation of spike protein in SARS-CoV-2 strengthens its binding to receptor ACE2. *eLife* **10**, e69091. 10.7554/eLife.69091.
5. Yang, J., Petitjean, S.J.L., Koehler, M., Zhang, Q., Dumitru, A.C., Chen, W., Derclaye, S., Vincent, S.P., Soumillon, P., and Alsteens, D. (2020). Molecular interaction and inhibition of SARS-CoV-2 binding to the ACE2 receptor. *Nat. Commun.* **11**, 4541. 10.1038/s41467-020-18319-6.
6. Koehler, M., Ray, A., Moreira, R.A., Juniku, B., Poma, A.B., and Alsteens, D. (2021). Molecular insights into receptor binding energetics and neutralization of SARS-CoV-2 variants. *Nat. Commun.* **12**, 6977. 10.1038/s41467-021-27325-1.
7. Cao, W., Dong, C., Kim, S., Hou, D., Tai, W., Du, L., Im, W., and Zhang, X.F. (2021). Biomechanical characterization of SARS-CoV-2 spike RBD and human ACE2 protein-protein interaction. *Biophys. J.* **120**, 1011-1019. 10.1016/j.bpj.2021.02.007.
8. Hu, W., Zhang, Y., Fei, P., Zhang, T., Yao, D., Gao, Y., Liu, J., Chen, H., Lu, Q., Mudianto, T., et al. (2021). Mechanical activation of spike fosters SARS-CoV-2 viral infection. *Cell Res.* **31**, 1047-1060. 10.1038/s41422-021-00558-x.
9. Bauer, M.S., Gruber, S., Hausch, A., Gomes, P., Milles, L.F., Nicolaus, T., Schendel, L.C., Navajas, P.L., Procko, E., Lietha, D., et al. (2022). A tethered ligand assay to probe SARS-CoV-2:ACE2 interactions. *Proc. Natl Acad. Sci. USA* **119**, e2114397119. 10.1073/pnas.2114397119.
